# Supplementary material
Source: Springer Nature journal article supplement (https://www.springermedizin.de/resource/supplementary/13023_2014_750_MOESM2_ESM.pdf/9642974)
Supplement: MOESM2 [file 9642974]

**Additional File 2. Genetic status of ICF patients.**

| <b>Patients (Gender)</b>  | <b>Amino acid changes in DNMT3B</b> | <b>Amino acid changes in ZBTB24</b> | <b>Birth year</b> | <b>Follow-up Status</b> <sup>(reference)</sup>                 |
|---------------------------|-------------------------------------|-------------------------------------|-------------------|----------------------------------------------------------------|
| <b>ICF1</b>               | <b>NP_008823.1</b>                  |                                     |                   |                                                                |
| <b>pG (M)</b>             | p. I41fsX42 / p.S780L               |                                     | 1985              | Deceased age 16 <sup>[1]</sup>                                 |
| <b>Cor (F)</b>            | p. A603T / p.R807delinsSTP          |                                     |                   | NA <sup>[2]</sup>                                              |
| <b>pR (F)</b>             | p. D817G / p. D817G                 |                                     | 1991              | Necker Hospital (Paris, France) <sup>[3]</sup>                 |
| <b>pW (F)</b>             | p.V613A / p.R826C                   |                                     | 2004              | NA <sup>[4]</sup>                                              |
| <b>pT (F)</b>             | p. D817G / p. D817G                 |                                     | 2004              | Deceased <sup>[5]</sup>                                        |
| <b>pI (M)</b>             | p. G663S / p.V726G                  |                                     | 1972              | Deceased <sup>[6]</sup>                                        |
| <b>pH (M)</b>             | p.V818M / p.V818M                   |                                     | 1990              | University Hospital Center (Nancy, France) <sup>[3]</sup>      |
| <b>P1*(F)</b>             | p. S655L / ?                        |                                     | 2010              | Necker Hospital (Paris, France)                                |
| <b>pY*(M)</b>             | p.T775I / p.T775I                   |                                     | 1996              | Necker Hospital (Paris, France)                                |
| <b>P2*(M)</b>             | p. R104X / p.I721T                  |                                     | 2008              | Necker Hospital (Paris, France)                                |
| <b>P3<sup>a</sup>*(F)</b> | p. G583S / p. G583S                 |                                     | 2009              | Necker Hospital (Paris, France)                                |
| <b>P4<sup>a</sup>*(F)</b> | p. G583S / p. G583S                 |                                     | 2013              | Necker Hospital (Paris, France)                                |
| <b>P5 (M)</b>             | p. K770E / p. K770E                 |                                     | 1991              | (Lebanon) <sup>[7]</sup>                                       |
| <b>ICF2</b>               |                                     | <b>NP_055612.2</b>                  |                   |                                                                |
| <b>pP (F)</b>             |                                     | p.R457X / p.R457X                   | 1981              | NA <sup>[8]</sup>                                              |
| <b>P6<sup>b</sup> (M)</b> |                                     | p.H132Q fsX19 / p.H132Q fsX19       | 2003              | Hotel-Dieu de France Hospital (Beirut, Lebanon) <sup>[9]</sup> |
| <b>pD<sup>b</sup> (M)</b> |                                     | p.H132Q fsX19 / p.H132Q fsX19       | 1997              | Hotel-Dieu de France Hospital (Beirut, Lebanon) <sup>[9]</sup> |
| <b>pV<sup>b</sup> (M)</b> |                                     | p.H132Q fsX19 / p.H132Q fsX19       | 1998              | Hotel-Dieu de France Hospital (Beirut, Lebanon) <sup>[9]</sup> |
| <b>P7 (M)</b>             |                                     | p.R320X / p.R320X                   | 1971              | Deceased <sup>[10]</sup>                                       |
| <b>P8 (F)</b>             |                                     | p.K263X / p.C327W fsX54             | 1996              | Necker Hospital (Paris, France) <sup>[10]</sup>                |
| <b>ICFX</b>               |                                     |                                     |                   |                                                                |
| <b>pC (F)</b>             |                                     |                                     |                   | NA <sup>[3]</sup>                                              |
| <b>pS (F)</b>             |                                     |                                     | 1978              | Necker Hospital (Paris, France) <sup>[3]</sup>                 |
| <b>pU (M)</b>             |                                     |                                     |                   | NA                                                             |
| <b>pN (F)</b>             |                                     |                                     |                   | NA <sup>[3]</sup>                                              |

M = male ; F = female ; \* and grey shade = newly described ICF1 patients in the current study ; <sup>a, b</sup> siblings; NA; not available

## REFERENCES

1. Turleau C, Cabanis MO, Girault D, Ledest F, Mettey R, Puissant H, Prieur M, de Grouchy J: Multibranched chromosomes in the ICF syndrome: immunodeficiency, centromeric instability, and facial anomalies. *Am J Med Genet* 1989, 32:420-424.
2. Carpenter NJ, Filipovich A, Blaese RM, Carey TL, Berkel AI: Variable immunodeficiency with abnormal condensation of the heterochromatin of chromosomes 1, 9, and 16. *J Pediatr* 1988, 112:757-760.
3. Jiang YL, Rigolet M, Bourc'his D, Nigon F, Bokesoy I, Fryns JP, Hulten M, Jonveaux P, Maraschio P, Megarbane A, et al: DNMT3B mutations and DNA methylation defect define two types of ICF syndrome. *Hum Mutat* 2005, 25:56-63.
4. Weemaes CM, van Tol MJ, Wang J, van Ostaijen-Ten Dam MM, van Eggermond MC, Thijssen PE, Aytekin C, Brunetti-Pierri N, van der Burg M, Graham Davies E, et al: Heterogeneous clinical presentation in ICF syndrome: correlation with underlying gene defects. *Eur J Hum Genet* 2013.
5. Rigolet M, Gregoire A, Lefort G, Blanchet P, Courbes C, Rodiere M, Sarda P, Viegas-Pequignot E: Early prenatal diagnosis of ICF syndrome by mutation detection. *Prenat Diagn* 2007, 27:1075-1078.
6. Hulten M: Selective somatic pairing and fragility at 1q12 in a boy with common variable immunodeficiency. *Clin Genet* 2008, 14:294-295.
7. Brun ME, Lana E, Rivals I, Lefranc G, Sarda P, Claustres M, Megarbane A, De Sario A: Heterochromatic genes undergo epigenetic changes and escape silencing in immunodeficiency, centromeric instability, facial anomalies (ICF) syndrome. *PLoS One* 2011, 6:e19464.
8. Maraschio P, Zuffardi O, Dalla Fior T, Tiepolo L: Immunodeficiency, centromeric heterochromatin instability of chromosomes 1, 9, and 16, and facial anomalies: the ICF syndrome. *J Med Genet* 1988, 25:173-180.
9. Chouery E, ACorbani S, el Ali N, Korban R, Salem N, Castro C, Klayme S, Azoury-Abou Rjeily M, Khoury-Matar R, Debo G, et al: A novel deletion in ZBTB24 in a Lebanese family with immunodeficiency, centromeric instability, and facial anomalies syndrome type 2. *Clin Genet* 2012, 82:489-493.
10. Nitta H, Unoki M, Ichiyanagi K, Kosho T, Shigemura T, Takahashi H, Velasco G, Francastel C, Picard C, Kubota T, Sasaki H: Three novel ZBTB24 mutations identified in Japanese and Cape Verdean type 2 ICF syndrome patients. *J Hum Genet* 2013.
